# Supplementary material
Source: HighWire-hosted journal article supplement (https://bmjophth.bmj.com/content/6/1/e000669)
Supplement: inline-supplementary-material-4 [file inline-supplementary-material-4.pdf]

**Appendix 4.** Proportions of variance explained by each of the five dimensions of patient burden

| <b>Appendix-4. Dimensions of Patient Burden</b>                    |                                         |
|--------------------------------------------------------------------|-----------------------------------------|
| <i>Dimension</i>                                                   | <i>Proportion of Variance Explained</i> |
| <b>Dimension 1:</b> Disruption of daily routine or normal capacity | 15.05%                                  |
| <b>Dimension 2:</b> Perceived anxiety                              | 14.16%                                  |
| <b>Dimension 3:</b> Frequency of visits                            | 13.53%                                  |
| <b>Dimension 4:</b> Chronicity of disease and treatment            | 13.43%                                  |
| <b>Dimension 5:</b> Perceived value of treatment/investment        | 10.77%                                  |
